# Supplementary material
Source: publisher figshare collection journal article supplement (https://asha.figshare.com/ndownloader/files/24501581)
Supplement: Supplementary file 1 [file 24501581]

## Supplemental Material S1.

The arcsine transform ( $T$ ) was applied as follows:

$$T = \arcsin\sqrt{\frac{X}{N+1}} + \arcsin\sqrt{\frac{X+1}{N+1}}$$

$X$  represents the total number of words reported correctly and  $N$  represents the total number of words presented. This was then transformed linearly:

$$R = 1.46 (31.83098861T - 50) + 50$$

where  $R$  indicates the resulting rationalized arcsine-transformed score (rau). This transformation extends the original percent correct scale outwards in both directions from 50%, creating bigger differences as the extremes of the range are approached. Consequently, this transformation makes the rationalized arcsine scale linear and additive in its proportions while producing values close to that of the original percentage scores (Studebaker, 1985).

## Reference

Studebaker, G. A. (1985). A “rationalized” arcsine transform. *Journal of Speech and Hearing Research*, 28, 455–462. <https://doi.org/10.1044/jshr.2803.455>

**Table S2.** Comparison of recognition scores with three modalities over time.

| Time point | With bilateral CI          |                |                    |                | With the first CI alone    |                |                    |                | With the second CI alone   |                |
|------------|----------------------------|----------------|--------------------|----------------|----------------------------|----------------|--------------------|----------------|----------------------------|----------------|
|            | Monosyllabic word in quiet |                | Sentences in noise |                | Monosyllabic word in quiet |                | Sentences in noise |                | Monosyllabic word in quiet |                |
|            | Mean $\pm SD$              | <i>p</i> value | Mean $\pm SD$      | <i>p</i> value | Mean $\pm SD$              | <i>p</i> value | Mean $\pm SD$      | <i>p</i> value | Median (min.-max.)         | <i>p</i> value |
| T0         | 57.75 $\pm$ 18.37          |                | 21.75 $\pm$ 20.83  |                | 57.46 $\pm$ 18.18          |                | 21.75 $\pm$ 20.84  |                | NA                         |                |
| 1 week     | 66.85 $\pm$ 16.04          | 0.996          | 37.75 $\pm$ 25.81  | 1.000          | 62.43 $\pm$ 18.44          | 1.000          | 30.71 $\pm$ 24.92  | 1.000          | 1.5% (0%–29.33%)           |                |
| 1 month    | 76.00 $\pm$ 11.80          | 0.005          | 51.54 $\pm$ 29.64  | 0.681          | 69.00 $\pm$ 15.99          | 0.044          | 41.73 $\pm$ 25.42  | 0.530          | 6.5% (0%–44.0%)            | 1.000          |
| 2 months   | 81.71 $\pm$ 10.43          | 0.000          | 59.35 $\pm$ 27.30  | 0.038          | 74.35 $\pm$ 14.00          | 0.002          | 48.21 $\pm$ 26.06  | 0.096          | 11.5% (0%–49.33%)          | 0.228          |
| 3 months   | 83.59 $\pm$ 9.07           | 0.000          | 61.80 $\pm$ 25.16  | 0.006          | 77.14 $\pm$ 10.48          | 0.001          | 49.71 $\pm$ 26.47  | 0.052          | 15.17% (8.0%–78.0%)        | 0.006          |
| 6 months   | 86.99 $\pm$ 6.24           | 0.000          | 72.31 $\pm$ 21.99  | 0.000          | 82.05 $\pm$ 6.05           | 0.000          | 56.25 $\pm$ 23.21  | 0.006          | 23.5% (12.0%–82.0%)        | 0.000          |
| 12 months  | 86.74 $\pm$ 5.66           | 0.000          | 75.23 $\pm$ 18.15  | 0.000          | 83.04 $\pm$ 7.89           | 0.000          | 62.32 $\pm$ 18.92  | 0.001          | 26.33% (15.0%–85.3%)       | 0.000          |

The means, *SDs* and *p* values for comparisons between test intervals for each ear condition (T0 vs. Other time points in the first side and bilateral CI, 1 week vs. Other time points in the second side) were shown in the table.

**Table S3.** Predictors of diverge time point.

| Predictor                                                 | Diverge time point (days) |           |
|-----------------------------------------------------------|---------------------------|-----------|
|                                                           | Spearman’s $\rho$         | $p$ value |
| Age at first CI                                           | 0.290                     | 0.315     |
| Age at second CI                                          | 0.315                     | 0.273     |
| inter-implant interval                                    | 0.335                     | 0.242     |
| LFPTA                                                     | 0.003                     | 0.997     |
| Recognition scores with 1 <sup>st</sup> CI at T0 in quiet | -0.228                    | 0.433     |
| Recognition scores with 1 <sup>st</sup> CI at T0 in noise | -0.181                    | 0.535     |

CI = Cochlear implantation; T0 = At the time the second implant was switched on; LFPTA = low frequency pure-tone average (in 250 Hz and 500 Hz).
